# Supplementary material for: Overexpression of IRS-4 Correlates with Procaspase 3 Levels in Tumoural Tissue of Patients with Colorectal Cancer
Source: Hindawi journal article supplement (doi:10.1155/2018/3812581), 2018-10-16
Supplement: f1 [file 3812581.f1.pdf]

## **Supplementary Material**

Table S1: Clinical characteristics of patients with colorectal tumours

| Patient | Age | Gender | Diagnostic             | Location         | TNM     | Tumor grade |
|---------|-----|--------|------------------------|------------------|---------|-------------|
| 1       | 49  | M      | Adenocarcinoma         | Descending colon | T2N0M0  | Moderately  |
| 2       | 67  | F      | Adenocarcinoma         | Rectum           | T1N0M0  | Well        |
| 3       | 71  | M      | Adenocarcinoma         | Ascending colon  | T4bN1M0 | Poorly      |
| 4       | 67  | F      | Adenocarcinoma         | Sigmoid          | T3aN1Mx | Poorly      |
| 5       | 60  | M      | Adenocarcinoma         | Sigmoid          | T3aN0Mx | Moderately  |
| 6       | 76  | M      | Adenocarcinoma         | Ascending colon  | T1N0Mx  | Moderately  |
| 7       | 74  | M      | Adenocarcinoma         | Rectum           | T3cN1Mx | Poorly      |
| 8       | 58  | M      | Adenocarcinoma         | Rectum           | T1N0M0  | Well        |
| 9       | 58  | M      | Tubulovillous adenomas | Rectum           | TisN0Mx | Well        |
| 10      | 50  | M      | Tubulovillous adenomas | Transverse colon | TisN0M0 | Well        |
| 11      | 48  | F      | Adenocarcinoma         | Rectum           | T3aN1Mx | Moderately  |
| 12      | 76  | M      | Adenocarcinoma         | Sigmoid          | T3dN2aM | Poorly      |
| 13      | 74  | M      | Adenocarcinoma         | Transverse colon | T1N0Mx  | Moderately  |
| 14      | 60  | M      | Adenocarcinoma         | Rectum           | T3aN1Mx | Moderately  |
| 15      | 77  | M      | Adenocarcinoma         | Rectum           | T3aN2Mx | Poorly      |
| 16      | 80  | M      | Adenocarcinoma         | Ascending colon  | T3aN0Mx | Moderately  |
| 17      | 66  | M      | Adenocarcinoma         | Ascending colon  | T3aN0Mx | Moderately  |
| 18      | 80  | M      | Adenocarcinoma         | Sigmoid          | T1N0Mx  | Moderately  |
| 19      | 77  | M      | Adenocarcinoma         | Sigmoid          | T3aN1M1 | Poorly      |
| 20      | 80  | F      | Adenocarcinoma         | Ascending colon  | T2N0M0  | Moderately  |
